# Supplementary figures and images for: Cone-Beam CT With Augmented Fluoroscopy Combined With Electromagnetic Navigation Bronchoscopy for Biopsy of Pulmonary Nodules
Source: PubMed Central journal article supplement — J Bronchology Interv Pulmonol. 2018 Sep 1;25(4):274–82. doi: 10.1097/LBR.0000000000000536 (PMC6166698; doi:10.1097/lbr.0000000000000536), 2018-09-01

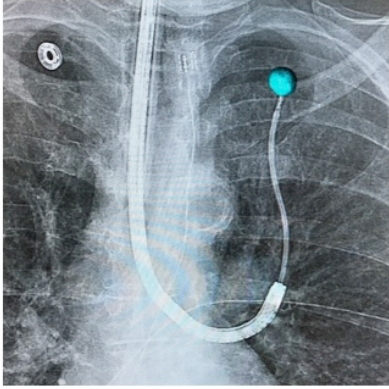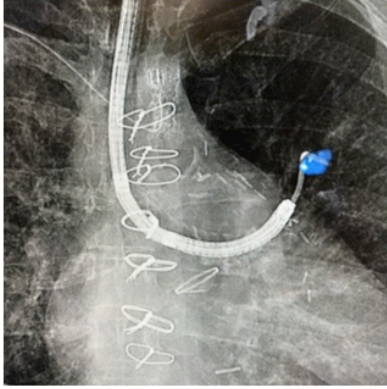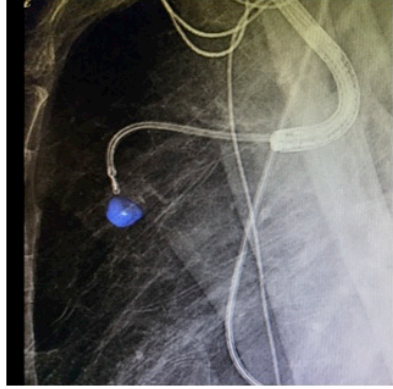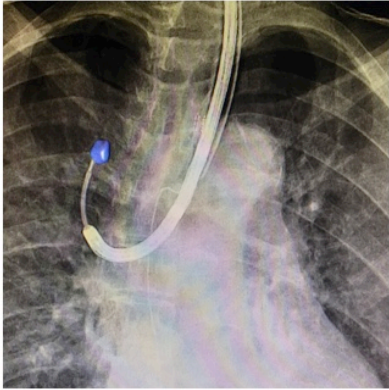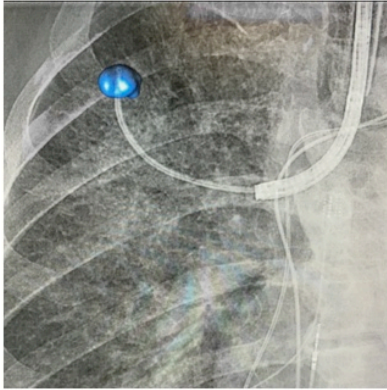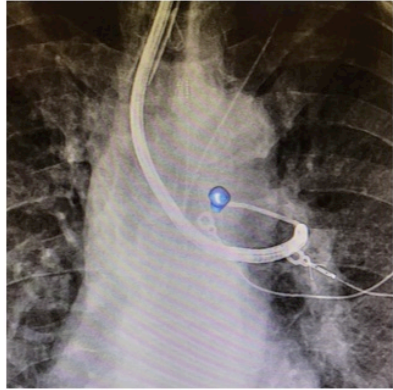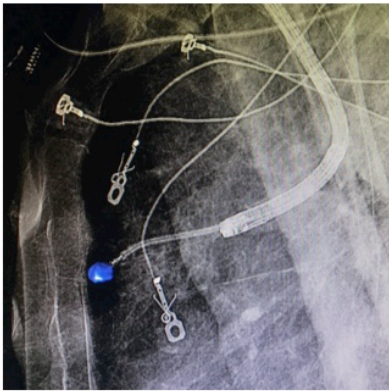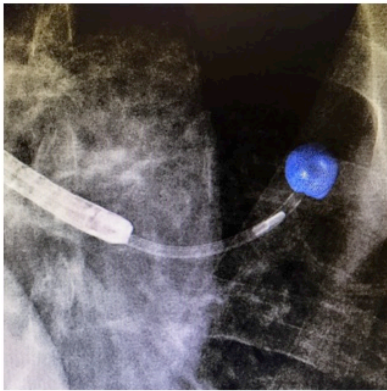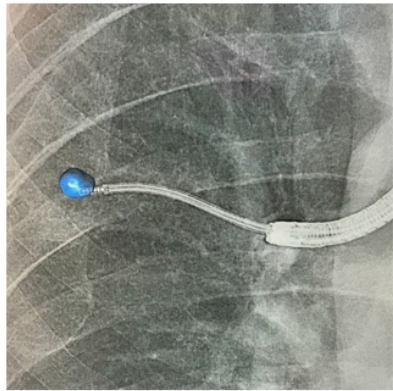

Supplement: lbr-25-274-s001.pdf [file lbr-25-274-s001.pdf]
